# Supplementary material for: Robust-adhesion and high-mechanical strength hydrogel for efficient wet tissue adhesion
Source: Royal Society of Chemistry journal article supplement (doi:10.1039/d4tb02357a), 2025-01-01
Supplement: d4tb02357a5.pdf [file d4tb02357a5.pdf]

## Supporting Information

### **Robust-adhesion and high-mechanical strength hydrogel for efficient wet tissue adhesion**

Chenyang Li<sup>a</sup>, Yang Qian<sup>a</sup>, Xueping Zhang<sup>a\*</sup>, and Rongwu Wang<sup>a\*</sup>

<sup>a</sup>Key Laboratory of Textile Science & Technology, Ministry of Education, College of Textiles, Donghua University, Shanghai 201620, China

Chenyang Li and Yang Qian contributed equally to this work.

\*Corresponding author. E-mails: [xpzhang@dhu.edu.cn](mailto:xpzhang@dhu.edu.cn), [wrr@dhu.edu.cn](mailto:wrr@dhu.edu.cn).

This file includes:

Figures S1 to S9

Tables S1 to S4

Videos S1 to S4

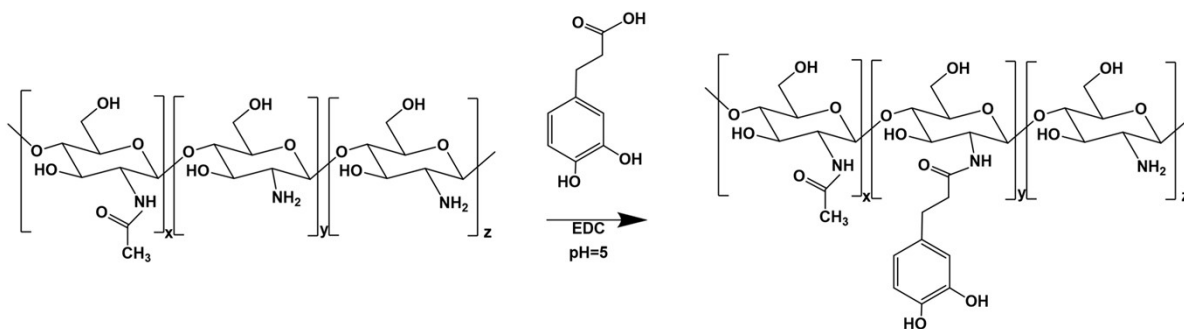

**Figure S1.** Schematic diagram of the synthesis of C-CS.

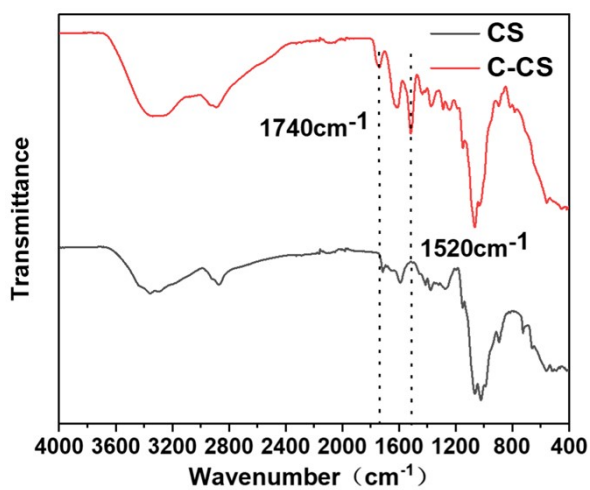

**Figure S2.** FT-IR spectra of CS and C-CS.

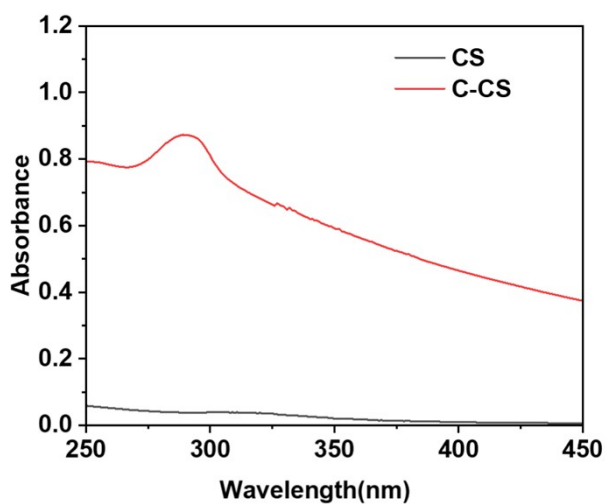

**Figure S3.** UV-Vis spectra of CS and C-CS.

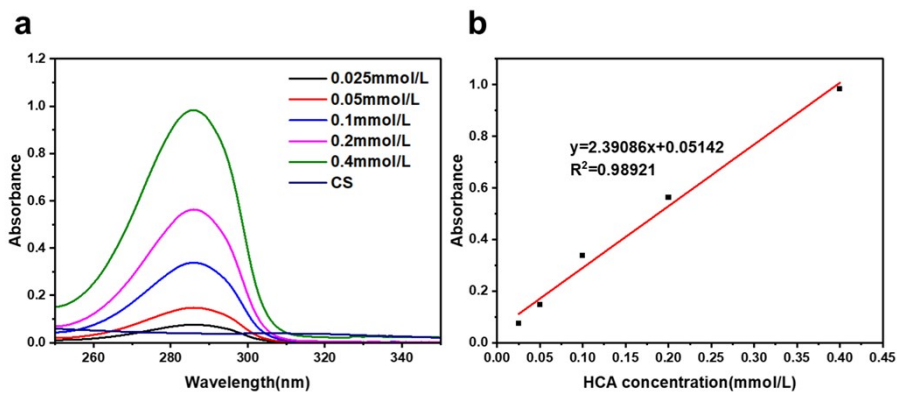

**Figure S4.** a) UV-Vis spectra of CS and different concentrations of HCA, b) standard working curve.

**Table S1.** Absorbance at 286 nm for different concentrations of HCA solution.

| HCA solution (mmol/L) | Absorbance |
|-----------------------|------------|
| 0.025                 | 0.076      |
| 0.05                  | 0.148      |
| 0.1                   | 0.339      |
| 0.2                   | 0.563      |
| 0.4                   | 0.984      |

**Table S2.** Composition of different hydrogels.

| Samples                 | AA<br>(wt%) | C-CS<br>(wt%) | $\alpha$ -ketoglutaric<br>acid<br>(wt%) | AA-NHS<br>ester<br>(wt%) | PEGDMA<br>(wt%) | Water<br>(g) |
|-------------------------|-------------|---------------|-----------------------------------------|--------------------------|-----------------|--------------|
| PAA20-NHS1/C-<br>CS2    | 20          | 2             | 0.2                                     | 1                        | 0.05            | 8            |
| PAA30-NHS1/C-<br>CS2    | 30          | 2             | 0.2                                     | 1                        | 0.05            | 7            |
| PAA40-NHS1/C-<br>CS2    | 40          | 2             | 0.2                                     | 1                        | 0.05            | 6            |
| PAA30/C-CS4             | 30          | 4             | 0.2                                     | 0                        | 0.05            | 7            |
| PAA30-NHS0.33/C-<br>CS4 | 30          | 4             | 0.2                                     | 0.33                     | 0.05            | 7            |
| PAA30-NHS0.67/C-<br>CS4 | 30          | 4             | 0.2                                     | 0.67                     | 0.05            | 7            |
| PAA30-NHS1              | 30          | 0             | 0.2                                     | 1                        | 0.05            | 7            |
| PAA30-NHS1/C-<br>CS1    | 30          | 1             | 0.2                                     | 1                        | 0.05            | 7            |
| PAA30-NHS1/C-<br>CS4    | 30          | 4             | 0.2                                     | 1                        | 0.05            | 7            |
| PAA30-NHS1/C-<br>CS6    | 30          | 6             | 0.2                                     | 1                        | 0.05            | 7            |

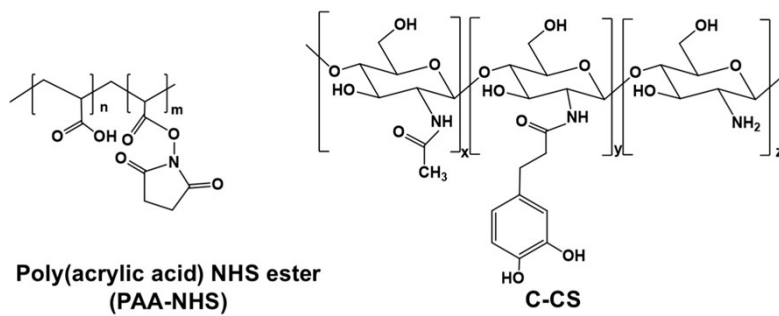

**Figure S5.** Chemical composition of the PAA-NHS/C-CS hydrogel based on PAA-NHS and C-CS.

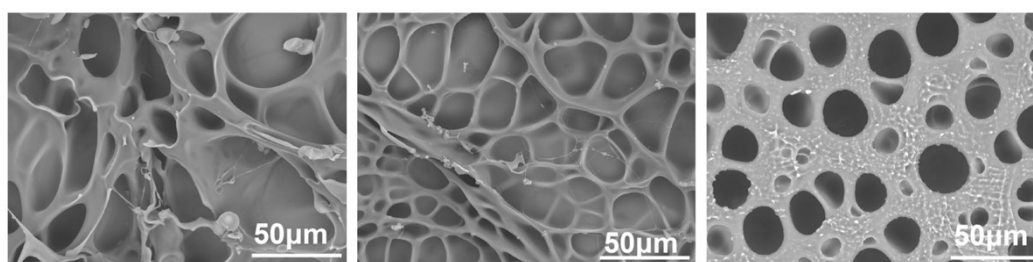

**Figure S6.** High-magnific SEM images of the freeze-dried PAA30/C-CS4, PAA30-NHS1, and PAA30-NHS1/C-CS4 hydrogel (from left to right).

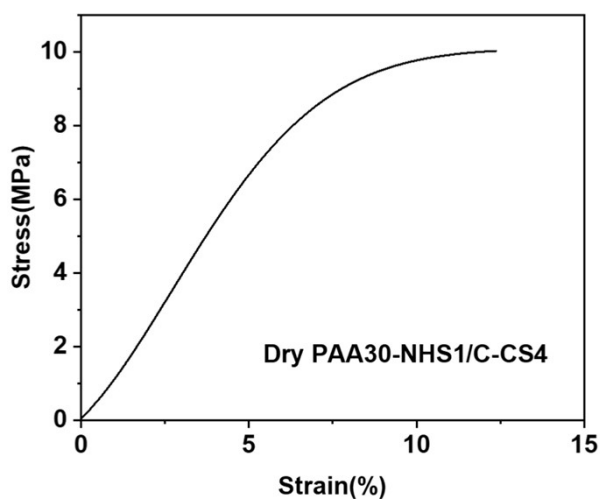

**Figure S7.** Stress-strain curves for the dry PAA30-NHS1/C-CS4 hydrogel.

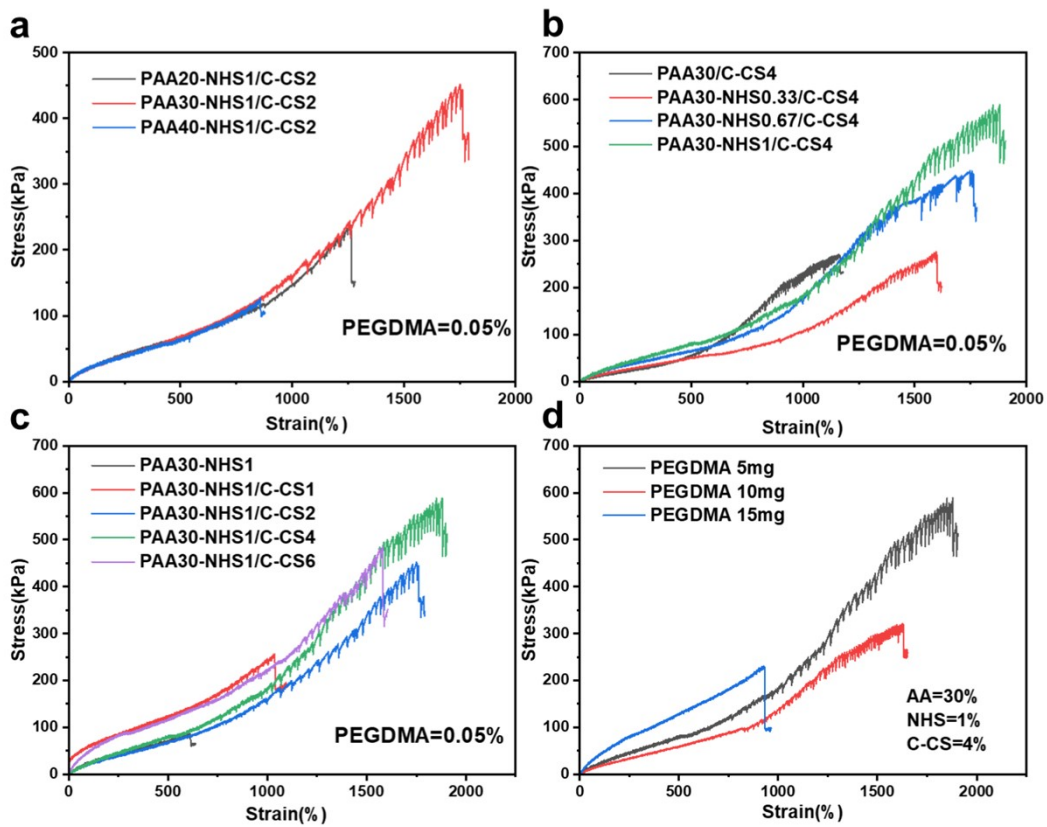

**Figure S8.** Effect of AA, AA-NHS ester, C-CS, and PEGDMA contents on the tensile properties of swollen hydrogels. Tensile stress-strain curves of swollen hydrogels with different (a) AA content, (b) AA-NHS ester content, (c) C-CS content, and (d) PEGDMA content.

**Table S3.** Mechanical properties of hydrogels.

|                                                   | Name                | Tensile stress<br>(kPa) | Strain (%)     |
|---------------------------------------------------|---------------------|-------------------------|----------------|
| Varied AA content                                 | PAA20-NHS1/C-CS2    | 246.5±13.44             | 1265.73±92.33  |
|                                                   | PAA30-NHS1/C-CS2    | 457.66±21.08            | 1847.14±86.07  |
|                                                   | PAA40-NHS1/C-CS2    | 121.5±7.78              | 840.74±53.05   |
| Varied AA-NHS ester<br>content                    | PAA30/C-CS4         | 253±45.74               | 1271.30±18.31  |
|                                                   | PAA30-NHS0.33/C-CS4 | 269.67±7.09             | 1535.39±85.83  |
|                                                   | PAA30-NHS0.67/C-CS4 | 386.67±53.27            | 1585.28±42.20  |
|                                                   | PAA30-NHS1/C-CS4    | 632±60.81               | 1974.19±96.03  |
| Varied C-CS content                               | PAA30-NHS1          | 85±7.21                 | 562.69±105.72  |
|                                                   | PAA30-NHS1/C-CS1    | 275.33±46.17            | 1028.18±77.35  |
|                                                   | PAA30-NHS1/C-CS2    | 457.66±21.08            | 1847.14±86.07  |
|                                                   | PAA30-NHS1/ C-CS4   | 632±60.81               | 1974.19±96.03  |
| PAA30-NHS1/C-CS4<br>with varied PEGDMA<br>content | PAA30-NHS1/C-CS6    | 561.33±37.91            | 1422.91±157.55 |
|                                                   | 5 mg                | 632±60.81               | 1974.19±96.03  |
|                                                   | 10 mg               | 349.5±22.31             | 1805.64±193.84 |
|                                                   | 15 mg               | 234.5±28.29             | 1100.6±118.99  |

**Table S4.** Comparison of wet tissue adhesive properties of PAA30-NHS1/C-CS4 hydrogel with other reported hydrogel adhesives.

| Name                 | Adhesion strength test Method | Wet adhesion strength to porcine skin | Reference |
|----------------------|-------------------------------|---------------------------------------|-----------|
| PDA-Silicate-CG      | Shear                         | 21.3 kPa                              | 1         |
| TA/PVA/PAA           | Shear                         | 31 kPa                                | 2         |
| CMC-DA/TA            | Shear                         | 45.9 kPa                              | 3         |
| PEG-SG/TA            | Shear                         | 62 kPa                                | 4         |
| PVA/PAAc-N           | Shear                         | 63.1 kPa                              | 5         |
| Fe-PAM-C-M           | Shear                         | 77.5 kPa                              | 6         |
| P (AA-co-UCAT5) -CS3 | Shear                         | 187.1 kPa                             | 7         |
| G0.6-T0.6-U0.12      | Shear                         | 152.9 kPa                             | 8         |
| PAA30-NHS1/C-CS4     | Shear                         | 163 kPa                               | This work |



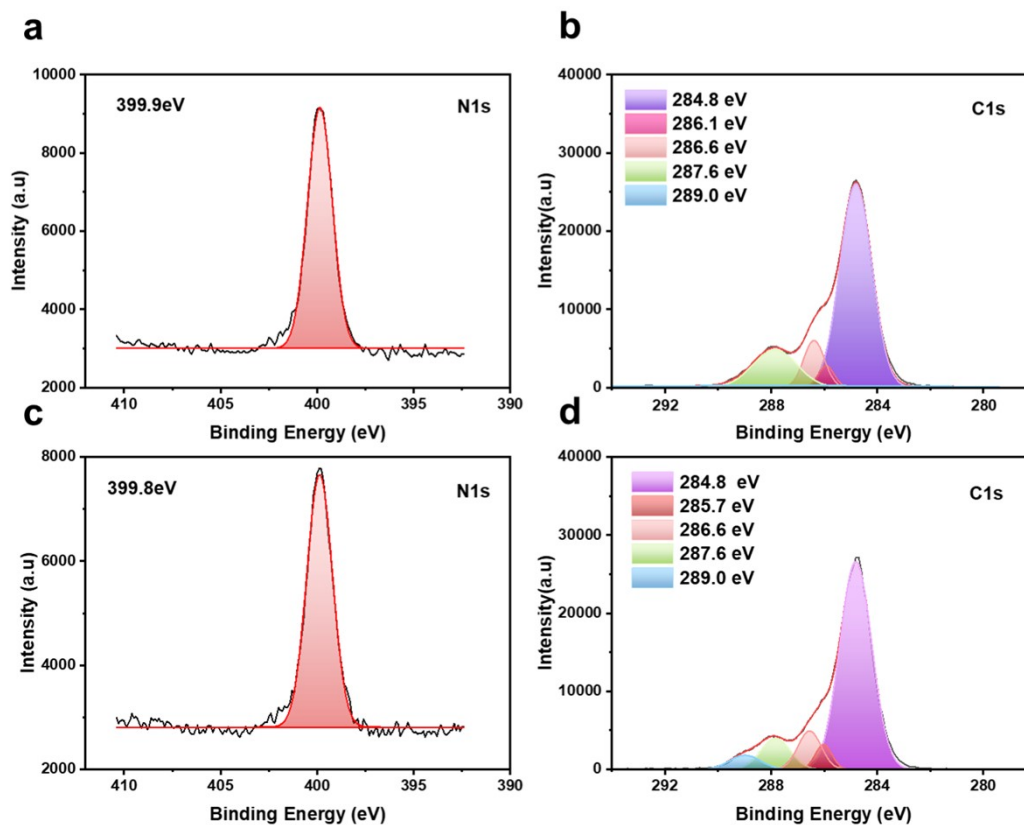

**Figure S9.** a) The N1s spectrum of untreated porcine skin. The peak at the binding energy of 399.9 eV could be attributed to C-N, demonstrating the presence of the  $\text{-NH}_2$  group in the porcine skin. b) The C1s spectrum of untreated porcine skin. The peaks at the binding energy of 284.8, 286.6, 287.6, and 289.0 eV could be assigned to C-C, C-O, N-C=O, and O-C=O, respectively. c) and d) The N1s and C1s spectrum of porcine skin after 30-minute adhesion of PAA30-NHS1/C-CS hydrogel.

## **Supporting Videos**

**Video S1.** The overall process of adhesion formation between wet porcine skins by the PAA30-NHS1/C-CS4 hydrogel.

**Video S2.** The PAA30-NHS1/C-CS4 hydrogel adhered for 5 min is peeled off from the porcine skin.

**Video S3.** The repeatable underwater adhesion of the PAA30-NHS1/C-CS4 hydrogel to porcine skin.

**Video S4.** Different adhesive properties of the PAA30-NHS1/C-CS4 hydrogel to underwater glass and porcine skin.

## Supporting References

1. Y. Chen, Y. Qiu, Q. Wang, D. Li, T. Hussain, H. Ke and Q. Wei, *Chemical Engineering Journal*, 2020, **399**, 125668.
2. J. Park, T. Y. Kim, Y. Kim, S. An, K. S. Kim, M. Kang, S. A. Kim, J. Kim, J. Lee, S.-W. Cho and J. Seo, *Advanced Science*, 2023, **10**, 2303651.
3. H. Xie, G. Shi, R. Wang, X. Jiang, Q. Chen, A. Yu and A. Lu, *Carbohydrate Polymers*, 2024, **334**, 122014.
4. F. Sun, Y. Bu, Y. Chen, F. Yang, J. Yu and D. Wu, *ACS Applied Materials & Interfaces*, 2020, **12**, 9132-9140.
5. P. Ma, W. Liang, R. Huang, B. Zheng, K. Feng, W. He, Z. Huang, H. Shen, H. Wang and D. Wu, *Advanced Materials*, 2024, **36**, 2305400.
6. L. Han, M. Wang, L. O. Prieto-López, X. Deng and J. Cui, *Advanced Functional Materials*, 2020, **30**, 1907064.
7. X. Fan, Y. Fang, W. Zhou, L. Yan, Y. Xu, H. Zhu and H. Liu, *Materials Horizons*, 2021, **8**, 997-1007.
8. X. Su, W. Xie, P. Wang, Z. Tian, H. Wang, Z. Yuan, X. Liu and J. Huang, *Materials Horizons*, 2021, **8**, 2199-2207.
